# Supplementary material for: Growth-promoting characteristics of potential nitrogen-fixing bacteria in the root of an invasive plant Ageratina adenophora
Source: PeerJ. 2019 Jun 12;7:e7099. doi: 10.7717/peerj.7099 (PMC6571004; doi:10.7717/peerj.7099)
Supplement: Supplemental Information 1 [file peerj-07-7099-s001.xlsx]

## Sheet: subculture
seq.	number	1st	2nd	3rd	4th	5th	6th	7th
YLX-3-5	YL24	√	√	√	√	√	√	√
YLX-1-6	YL05	√	√	√	√	√	√	√
YLX-3-2	YL21	√	√	√	√	√	√	√
YLX-3-1	YL20	√	√	√	√	√	√	√
YLX-2-9	YL18	√	√	√	√	√	√	√
YLX-1-7	YL06	×	0	0	0	0	0	0
YLX-2-8	YL17	√	√	√	√	√	√	√
YLX-2-7	YL16	√	√	√	√	√	√	√
WS-3-7	WS27	√	√	√	√	√	√	√
XM-1-6	XM07	√	√	√	√	√	√	√
XM-1-10	XM12	√	√	√	√	√	√	√
YLX-1-2	YL01	√	√	√	√	√	√	√
WS-2-9	WS18	√	√	√	√	√	√	√
YLX-3-3	YL22	√	√	√	√	√	√	√
XM-2-2	XM14	√	√	√	√	√	√	√
XS-1-4	XS05	√	√	√	√	√	√	√
XS-1-9-B	XS10	√	√	√	√	√	√	√
CY-3-6	CY26	√	√	√	√	√	√	√
YLX-2-3	YL12	√	√	√	√	√	√	√
WS-3-9	WS29	√	√	√	√	√	√	√
YLX-3-6	YL25	√	√	√	√	√	√	√
XM-3-4	XM26	√	√	√	√	√	√	√
XM-2-10	XM22	√	√	√	√	√	√	√
CY-2-9	CY19	√	√	√	√	√	√	√
CY-2-6	CY16	√	√	√	√	√	√	√
XM-3-1	XM23	√	√	√	√	√	√	√
XM-1-2	XM02	√	√	√	√	√	√	√
CY-1-3	CY03	√	√	√	√	√	√	√
CY-2-1	CY11	√	√	√	√	√	√	√
CY-1-6	CY06	√	√	√	√	√	√	√
XM-3-7	XM29	√	√	√	√	√	√	√
XM-3-8	XM30	√	√	√	√	√	√	√
XM-3-6	XM28	√	√	√	√	√	√	√
XM-3-5	XM27	√	√	√	√	√	√	√
XM-1-3	XM03	×	0	0	0	0	0	0
XM-3-10	XM32	√	√	√	√	√	√	√
XM-3-3	XM25	√	√	√	√	√	√	√
XM-3-2	XM24	√	√	√	√	√	√	√
XM-2-6	XM18	√	√	√	√	√	√	√
XM-2-3	XM15	√	√	√	√	√	√	√
CY-3-3	CY23	√	√	√	√	√	√	√
YLX-3-4	YL23	√	√	√	√	√	√	√
YLX-1-4	YL03	√	√	√	√	√	√	√
YLX-2-4	YL13	√	√	√	√	√	√	√
YLX-2-6	YL15	√	√	√	√	√	√	√
YLX-2-2	YL11	√	√	√	√	√	√	√
YLX-2-1	YL10	√	√	√	√	√	√	√
YLX-3-10	YL29	√	√	√	√	√	√	√
XM-2-8	XM20	√	√	√	√	√	√	√
WS-1-9	WS08	√	√	√	√	√	√	√
YLX-3-9	YL28	√	√	√	√	√	√	√
YLX-2-10	YL19	√	√	√	√	√	√	√
WS-2-4	WS13	√	√	√	√	√	√	√
WS-1-4	WS04	√	√	√	√	√	√	√
XS-2-10	XS22	√	√	√	√	√	√	√
WS-1-2	WS02	√	√	√	√	√	√	√
CY-3-9	CY29	√	√	√	√	√	√	√
YLX-2-5	YL14	√	√	√	√	√	√	√
WS-2-3	WS12	√	√	√	√	√	√	√
WS-3-5	WS24	√	√	√	√	√	√	√
XM-2-5	XM17	√	√	√	√	√	√	√
CY-3-4	CY24	√	√	√	√	√	√	√
CY-3-10	CY21	×	0	0	0	0	0	0
CY-1-4	CY04	√	√	√	√	√	√	√
WS-1-10	WS09	√	√	√	√	√	√	√
CY-1-9	CY09	√	√	√	√	√	√	√
CY-3-7	CY27	√	√	√	√	√	√	√
WS-3-4	WS23	√	√	√	√	√	√	√
XM-2-1	XM13	√	√	√	√	√	√	√
CY-3-8	CY28	√	√	√	√	√	√	√
CY-2-8	CY18	√	√	√	√	√	√	√
CY-2-5	CY15	√	√	√	√	√	√	√
CY-2-2	CY12	√	√	√	√	√	√	√
CY-2-3	CY13	√	√	√	√	√	√	√
YLX-3-7	YL26	√	√	√	√	√	√	√
CY-2-7	CY17	√	√	√	√	√	√	√
XS-1-6	XS07	√	√	√	√	√	√	√
CY-2-4	CY14	√	√	√	√	√	√	√
YLX-1-8	YL07	√	√	√	√	√	√	√
YLX-1-9	YL08	√	√	√	√	√	√	√
YLX-1-3	YL02	√	√	√	√	√	√	√
CY-2-10	CY20	√	√	√	√	√	√	√
WS-2-5	WS14	√	√	√	√	√	√	√
XS-1-9-A	XS09	√	√	√	√	√	√	√
XS-1-10	XS11	√	√	√	√	√	√	√
XS-1-1-B	XS02	√	√	√	√	√	√	√
XS-2-1-B	XS13	√	√	√	√	√	√	√
XS-1-1-A	XS01	√	√	√	√	√	√	√
XS-2-2	XS14	√	√	√	√	√	√	√
XS-2-8	XS20	√	√	√	√	√	√	√
XS-2-6	XS18	√	√	√	√	√	√	√
YLX-3-8	YL27	√	√	√	√	√	√	√
WS-1-3	WS03	×	0	0	0	0	0	0
YLX-1-10	YL09	√	√	√	√	√	√	√
XS-3-8	XS28	√	√	√	√	√	√	√
XS-3-10	XS30	√	√	√	√	√	√	√
XS-1-3	XS04	√	√	×	0	0	0	0
XM-1-5-B	XM06	√	√	√	√	√	√	√
XM-1-5-A	XM05	√	√	√	√	√	√	√
XM-1-8-A	XM09	√	√	√	√	√	√	√
XM-1-8-B	XM10	√	√	√	√	√	√	√
XS-2-1-A	XS12	√	√	√	√	√	√	√
XM-1-1	XM01	√	√	√	√	√	√	√
WS-2-10	WS19	√	√	√	√	√	√	√
XS-2-3	XS15	√	√	√	√	√	√	√
WS-2-7	WS16	√	√	×	0	0	0	0
CY-1-7	CY07	√	√	√	√	√	√	√
CY-1-2	CY02	√	√	√	√	√	√	√
WS-2-2	WS11	√	√	√	√	√	√	√
WS-3-1	WS20	√	√	√	√	√	√	√
XS-1-8	XS08	√	√	√	√	√	√	√
WS-3-3	WS22	√	√	√	√	√	√	√
XS-1-5	XS06	√	√	√	√	√	√	√
WS-1-1	WS01	√	√	√	√	√	√	√
WS-2-1	WS10	√	√	√	√	√	√	√
XM-1-4	XM04	√	√	√	√	√	√	√
XM-1-7	XM08	√	√	√	√	√	√	√
CY-1-10	CY10	×	0	0	0	0	0	0
XS-3-1	XS23	√	√	√	√	√	√	√
XS-3-5	XS25	√	√	√	√	√	√	√
XS-3-7	XS27	×	0	0	0	0	0	0
WS-2-6	WS15	√	√	√	√	√	√	√
WS-2-8	WS17	√	√	√	√	√	√	√
WS-1-8	WS07	√	√	√	√	√	√	√
WS-1-7	WS06	√	√	√	√	√	√	√
XM-2-4	XM16	√	√	√	√	√	√	√
XM-2-7	XM19	√	√	√	√	√	√	√
XS-2-7	XS19	×	0	0	0	0	0	0
CY-1-8	CY08	×	0	0	0	0	0	0
XS-3-6	XS26	√	√	×	0	0	0	0
XS-1-2	XS03	√	×	0	0	0	0	0
CY-3-5	CY25	√	√	√	√	√	√	√
XS-2-4	XS16	×	0	0	0	0	0	0
YLX-1-5	YL04	√	√	√	√	√	√	√
XS-2-9	XS21	√	√	√	√	√	√	√
WS-1-5	WS05	√	√	√	√	√	√	√
CY-3-2	CY22	×	0	0	0	0	0	0
WS-3-8	WS28	√	√	√	√	√	√	√
CY-1-5	CY05	√	√	√	√	√	√	√
WS-3-6-A	WS25	√	√	√	√	√	√	√
XM-3-9	XM31	√	√	√	√	√	√	√
WS-3-10	WS30	√	×	0	0	0	0	0
WS-3-2	WS21	√	√	√	√	√	√	√
WS-3-6-B	WS26	√	√	√	√	√	√	√
XS-3-9	XS29	√	√	√	√	√	√	√
XM-1-9	XM11	√	×	0	0	0	0	0
XM-2-9	XM21	√	√	×	0	0	0	0
CY-1-1	CY01	×	0	0	0	0	0	0
XS-2-5	XS17	√	√	√	√	√	×	0
XS-3-3	XS24	√	√	√	√	√	√	√

## Sheet: otu
label	numOtus	Otu001	Otu002	Otu003	Otu004	Otu005	Otu006	Otu007	Otu008	Otu009	Otu010	Otu011	Otu012	Otu013	Otu014	Otu015	Otu016	Otu017	Otu018	Otu019	Otu020	Otu021	Otu022	Otu023	Otu024	Otu025	Otu026	Otu027	Otu028	Otu029	Otu030	Otu031	Otu032	Otu033	Otu034	Otu035	Otu036	Otu037	Otu038	Otu039	Otu040	Otu041	Otu042	Otu043	Otu044	Otu045	Otu046	Otu047	Otu048
unique	67	XM-2-10,CY-2-1,XM-3-10,XM-3-5,XM-3-4,XM-2-6,XM-3-1,XM-1-2,CY-1-6,XM-3-3,CY-2-6,XM-3-2,CY-1-3,YLX-3-6,XM-3-7,CY-2-9,XM-3-8,WS-3-9,XM-3-6	WS-3-4,CY-3-4,CY-3-7,XM-2-5,YLX-2-5,WS-2-3,XM-2-1,CY-3-8,CY-3-9,CY-1-4,WS-3-5,WS-1-10,CY-1-9	XM-1-10,XS-1-4,YLX-3-3,XM-1-6,XS-1-9-B,YLX-1-2,XM-2-2,WS-3-7,YLX-2-7,WS-2-9	YLX-2-8,YLX-2-9,YLX-1-6,YLX-3-1,YLX-3-5,YLX-3-2	WS-1-2,WS-2-4,WS-1-4,XS-2-10	XM-1-8-B,XS-2-1-A,XM-1-8-A,XM-1-1	YLX-3-10,YLX-2-1,YLX-2-2	YLX-1-4,YLX-2-4,YLX-2-6	XS-3-5,XS-3-1	CY-2-5,CY-2-8	WS-1-1,WS-2-1	XM-1-7,XM-1-4	XM-1-5-B,XS-3-10	WS-1-7,WS-1-8	XM-2-7,XM-2-4	CY-2-3,CY-2-2	XS-1-1-B,XS-2-1-B	CY-1-2,CY-1-7	YLX-1-9	XS-1-8	WS-3-3	WS-2-8	XM-2-3	WS-3-2	WS-2-10	CY-2-7	WS-3-6-B	XS-1-10	XS-1-5	CY-3-6	XM-3-9	XS-2-2	YLX-2-10	WS-1-9	XS-3-8	WS-2-2	YLX-3-8	YLX-3-9	XS-3-3	YLX-3-7	XS-1-9-A	XS-2-3	XS-2-6	WS-3-1	XS-2-8	YLX-1-5	WS-2-5	XS-1-1-A
0.01	35	XM-2-10,CY-2-1,XM-3-10,XM-3-5,XM-3-4,XM-2-6,XM-3-1,XM-1-2,CY-1-6,XM-3-3,CY-2-6,XM-3-2,CY-1-3,YLX-3-6,XM-3-7,CY-2-9,XM-3-8,WS-3-9,XM-3-6,YLX-2-3,XM-2-3,CY-3-3,XM-1-10,XS-1-4,YLX-3-3,XM-1-6,XS-1-9-B,YLX-1-2,XM-2-2,WS-3-7,YLX-2-7,WS-2-9,YLX-2-8,YLX-2-9,YLX-1-6,YLX-3-1,YLX-3-5,YLX-3-2,CY-3-6,YLX-3-4,YLX-3-10,YLX-2-1,YLX-2-2,YLX-1-4,YLX-2-4,YLX-2-6,XM-2-8,WS-1-9,YLX-3-9,YLX-2-10,WS-3-4,CY-3-4,CY-3-7,X…	XS-2-2,XS-1-1-B,XS-2-1-B,XS-1-1-A,XS-2-8,XS-1-10,XS-1-9-A,XS-2-6,YLX-3-8	XM-1-8-B,XS-2-1-A,XM-1-8-A,XM-1-1	CY-1-2,CY-1-7,WS-2-2	XM-1-5-B,XS-3-10,XM-1-5-A	CY-2-7,XS-1-6	XS-3-5,XS-3-1	WS-1-7,WS-1-8	XS-2-3,WS-2-10	WS-2-5,CY-2-10	WS-1-1,WS-2-1	XM-1-7,XM-1-4	YLX-1-9,YLX-1-8	XM-2-7,XM-2-4	WS-2-8,WS-2-6	CY-1-5	XS-1-5	WS-3-6-B	YLX-1-10	YLX-1-5	WS-3-1	WS-3-3	XM-3-9	XS-1-8	XS-3-3	WS-3-2	YLX-1-3	WS-1-5	WS-3-6-A	XS-3-9	XS-2-9	XS-3-8	CY-3-5	WS-3-8	CY-2-4
0.02	24	XM-2-10,CY-2-1,XM-3-10,XM-3-5,XM-3-4,XM-2-6,XM-3-1,XM-1-2,CY-1-6,XM-3-3,CY-2-6,XM-3-2,CY-1-3,YLX-3-6,XM-3-7,CY-2-9,XM-3-8,WS-3-9,XM-3-6,YLX-2-3,XM-2-3,CY-3-3,XM-1-10,XS-1-4,YLX-3-3,XM-1-6,XS-1-9-B,YLX-1-2,XM-2-2,WS-3-7,YLX-2-7,WS-2-9,YLX-2-8,YLX-2-9,YLX-1-6,YLX-3-1,YLX-3-5,YLX-3-2,CY-3-6,YLX-3-4,YLX-3-10,YLX-2-1,YLX-2-2,YLX-1-4,YLX-2-4,YLX-2-6,XM-2-8,WS-1-9,YLX-3-9,YLX-2-10,WS-3-4,CY-3-4,CY-3-7,X…	XS-2-2,XS-1-1-B,XS-2-1-B,XS-1-1-A,XS-2-8,XS-1-10,XS-1-9-A,XS-2-6,YLX-3-8,YLX-1-10,XS-3-8	XM-1-8-B,XS-2-1-A,XM-1-8-A,XM-1-1,XM-1-5-B,XS-3-10,XM-1-5-A	CY-1-2,CY-1-7,WS-2-2	XS-1-5,WS-1-1,WS-2-1	WS-3-1,XS-1-8,WS-3-3	WS-2-8,WS-2-6	XM-2-7,XM-2-4	XM-1-7,XM-1-4	XS-2-3,WS-2-10	WS-1-7,WS-1-8	XS-3-5,XS-3-1	XS-3-9	CY-3-5	WS-3-6-A	WS-3-8	XS-2-9	WS-1-5	CY-1-5	WS-3-2	WS-3-6-B	YLX-1-5	XM-3-9	XS-3-3
0.03	23	XM-2-10,CY-2-1,XM-3-10,XM-3-5,XM-3-4,XM-2-6,XM-3-1,XM-1-2,CY-1-6,XM-3-3,CY-2-6,XM-3-2,CY-1-3,YLX-3-6,XM-3-7,CY-2-9,XM-3-8,WS-3-9,XM-3-6,YLX-2-3,XM-2-3,CY-3-3,XM-1-10,XS-1-4,YLX-3-3,XM-1-6,XS-1-9-B,YLX-1-2,XM-2-2,WS-3-7,YLX-2-7,WS-2-9,YLX-2-8,YLX-2-9,YLX-1-6,YLX-3-1,YLX-3-5,YLX-3-2,CY-3-6,YLX-3-4,YLX-3-10,YLX-2-1,YLX-2-2,YLX-1-4,YLX-2-4,YLX-2-6,XM-2-8,WS-1-9,YLX-3-9,YLX-2-10,WS-3-4,CY-3-4,CY-3-7,X…	XS-2-2,XS-1-1-B,XS-2-1-B,XS-1-1-A,XS-2-8,XS-1-10,XS-1-9-A,XS-2-6,YLX-3-8,YLX-1-10,XS-3-8	XS-2-3,WS-2-10,XM-1-8-B,XS-2-1-A,XM-1-8-A,XM-1-1,XM-1-5-B,XS-3-10,XM-1-5-A	CY-1-2,CY-1-7,WS-2-2	XS-1-5,WS-1-1,WS-2-1	WS-3-1,XS-1-8,WS-3-3	XS-3-5,XS-3-1	WS-2-8,WS-2-6	XM-2-7,XM-2-4	XM-1-7,XM-1-4	WS-1-7,WS-1-8	YLX-1-5	XM-3-9	WS-3-6-B	XS-3-3	CY-3-5	WS-3-2	CY-1-5	WS-1-5	WS-3-6-A	XS-3-9	XS-2-9	WS-3-8
0.04	19	XM-2-10,CY-2-1,XM-3-10,XM-3-5,XM-3-4,XM-2-6,XM-3-1,XM-1-2,CY-1-6,XM-3-3,CY-2-6,XM-3-2,CY-1-3,YLX-3-6,XM-3-7,CY-2-9,XM-3-8,WS-3-9,XM-3-6,YLX-2-3,XM-2-3,CY-3-3,XM-1-10,XS-1-4,YLX-3-3,XM-1-6,XS-1-9-B,YLX-1-2,XM-2-2,WS-3-7,YLX-2-7,WS-2-9,YLX-2-8,YLX-2-9,YLX-1-6,YLX-3-1,YLX-3-5,YLX-3-2,CY-3-6,YLX-3-4,YLX-3-10,YLX-2-1,YLX-2-2,YLX-1-4,YLX-2-4,YLX-2-6,XM-2-8,WS-1-9,YLX-3-9,YLX-2-10,WS-3-4,CY-3-4,CY-3-7,X…	XS-2-2,XS-1-1-B,XS-2-1-B,XS-1-1-A,XS-2-8,XS-1-10,XS-1-9-A,XS-2-6,YLX-3-8,YLX-1-10,XS-3-8	XS-2-3,WS-2-10,XM-1-8-B,XS-2-1-A,XM-1-8-A,XM-1-1,XM-1-5-B,XS-3-10,XM-1-5-A	XS-1-5,WS-1-1,WS-2-1,XM-1-7,XM-1-4	CY-1-2,CY-1-7,WS-2-2,WS-1-5	XS-3-5,XS-3-1,XM-3-9	WS-3-1,XS-1-8,WS-3-3	XM-2-7,XM-2-4,WS-3-8	WS-1-7,WS-1-8	WS-2-8,WS-2-6	XS-3-9	XS-2-9	CY-3-5	WS-3-6-A	CY-1-5	WS-3-2	WS-3-6-B	YLX-1-5	XS-3-3
0.05	17	XM-2-10,CY-2-1,XM-3-10,XM-3-5,XM-3-4,XM-2-6,XM-3-1,XM-1-2,CY-1-6,XM-3-3,CY-2-6,XM-3-2,CY-1-3,YLX-3-6,XM-3-7,CY-2-9,XM-3-8,WS-3-9,XM-3-6,YLX-2-3,XM-2-3,CY-3-3,XM-1-10,XS-1-4,YLX-3-3,XM-1-6,XS-1-9-B,YLX-1-2,XM-2-2,WS-3-7,YLX-2-7,WS-2-9,YLX-2-8,YLX-2-9,YLX-1-6,YLX-3-1,YLX-3-5,YLX-3-2,CY-3-6,YLX-3-4,YLX-3-10,YLX-2-1,YLX-2-2,YLX-1-4,YLX-2-4,YLX-2-6,XM-2-8,WS-1-9,YLX-3-9,YLX-2-10,WS-3-4,CY-3-4,CY-3-7,X…	XS-2-3,WS-2-10,XM-1-8-B,XS-2-1-A,XM-1-8-A,XM-1-1,XM-1-5-B,XS-3-10,XM-1-5-A,XS-1-5,WS-1-1,WS-2-1,XM-1-7,XM-1-4	XS-2-2,XS-1-1-B,XS-2-1-B,XS-1-1-A,XS-2-8,XS-1-10,XS-1-9-A,XS-2-6,YLX-3-8,YLX-1-10,XS-3-8	CY-1-2,CY-1-7,WS-2-2,WS-1-5	XS-3-5,XS-3-1,XM-3-9	XM-2-7,XM-2-4,WS-3-8	WS-3-1,XS-1-8,WS-3-3	WS-1-7,WS-1-8	WS-3-6-B,CY-1-5	WS-2-8,WS-2-6	XS-3-3	YLX-1-5	CY-3-5	WS-3-2	WS-3-6-A	XS-3-9	XS-2-9
0.06	16	XM-2-10,CY-2-1,XM-3-10,XM-3-5,XM-3-4,XM-2-6,XM-3-1,XM-1-2,CY-1-6,XM-3-3,CY-2-6,XM-3-2,CY-1-3,YLX-3-6,XM-3-7,CY-2-9,XM-3-8,WS-3-9,XM-3-6,YLX-2-3,XM-2-3,CY-3-3,XM-1-10,XS-1-4,YLX-3-3,XM-1-6,XS-1-9-B,YLX-1-2,XM-2-2,WS-3-7,YLX-2-7,WS-2-9,YLX-2-8,YLX-2-9,YLX-1-6,YLX-3-1,YLX-3-5,YLX-3-2,CY-3-6,YLX-3-4,YLX-3-10,YLX-2-1,YLX-2-2,YLX-1-4,YLX-2-4,YLX-2-6,XM-2-8,WS-1-9,YLX-3-9,YLX-2-10,WS-3-4,CY-3-4,CY-3-7,X…	CY-1-2,CY-1-7,WS-2-2,WS-1-5,XS-2-3,WS-2-10,XM-1-8-B,XS-2-1-A,XM-1-8-A,XM-1-1,XM-1-5-B,XS-3-10,XM-1-5-A,XS-1-5,WS-1-1,WS-2-1,XM-1-7,XM-1-4	XS-2-2,XS-1-1-B,XS-2-1-B,XS-1-1-A,XS-2-8,XS-1-10,XS-1-9-A,XS-2-6,YLX-3-8,YLX-1-10,XS-3-8	XS-3-5,XS-3-1,XM-3-9	WS-3-1,XS-1-8,WS-3-3	XM-2-7,XM-2-4,WS-3-8	WS-1-7,WS-1-8	WS-3-6-B,CY-1-5	WS-2-8,WS-2-6	CY-3-5	XS-3-3	YLX-1-5	WS-3-2	WS-3-6-A	XS-3-9	XS-2-9
0.07	15	XM-2-10,CY-2-1,XM-3-10,XM-3-5,XM-3-4,XM-2-6,XM-3-1,XM-1-2,CY-1-6,XM-3-3,CY-2-6,XM-3-2,CY-1-3,YLX-3-6,XM-3-7,CY-2-9,XM-3-8,WS-3-9,XM-3-6,YLX-2-3,XM-2-3,CY-3-3,XM-1-10,XS-1-4,YLX-3-3,XM-1-6,XS-1-9-B,YLX-1-2,XM-2-2,WS-3-7,YLX-2-7,WS-2-9,YLX-2-8,YLX-2-9,YLX-1-6,YLX-3-1,YLX-3-5,YLX-3-2,CY-3-6,YLX-3-4,YLX-3-10,YLX-2-1,YLX-2-2,YLX-1-4,YLX-2-4,YLX-2-6,XM-2-8,WS-1-9,YLX-3-9,YLX-2-10,WS-3-4,CY-3-4,CY-3-7,X…	CY-1-2,CY-1-7,WS-2-2,WS-1-5,XS-2-3,WS-2-10,XM-1-8-B,XS-2-1-A,XM-1-8-A,XM-1-1,XM-1-5-B,XS-3-10,XM-1-5-A,XS-1-5,WS-1-1,WS-2-1,XM-1-7,XM-1-4,XS-3-9	XS-2-2,XS-1-1-B,XS-2-1-B,XS-1-1-A,XS-2-8,XS-1-10,XS-1-9-A,XS-2-6,YLX-3-8,YLX-1-10,XS-3-8	XS-3-5,XS-3-1,XM-3-9	WS-3-1,XS-1-8,WS-3-3	XM-2-7,XM-2-4,WS-3-8	WS-1-7,WS-1-8	WS-3-6-B,CY-1-5	WS-2-8,WS-2-6	CY-3-5	XS-3-3	YLX-1-5	WS-3-2	WS-3-6-A	XS-2-9
0.08	14	XM-2-10,CY-2-1,XM-3-10,XM-3-5,XM-3-4,XM-2-6,XM-3-1,XM-1-2,CY-1-6,XM-3-3,CY-2-6,XM-3-2,CY-1-3,YLX-3-6,XM-3-7,CY-2-9,XM-3-8,WS-3-9,XM-3-6,YLX-2-3,XM-2-3,CY-3-3,XM-1-10,XS-1-4,YLX-3-3,XM-1-6,XS-1-9-B,YLX-1-2,XM-2-2,WS-3-7,YLX-2-7,WS-2-9,YLX-2-8,YLX-2-9,YLX-1-6,YLX-3-1,YLX-3-5,YLX-3-2,CY-3-6,YLX-3-4,YLX-3-10,YLX-2-1,YLX-2-2,YLX-1-4,YLX-2-4,YLX-2-6,XM-2-8,WS-1-9,YLX-3-9,YLX-2-10,WS-3-4,CY-3-4,CY-3-7,X…	CY-1-2,CY-1-7,WS-2-2,WS-1-5,XS-2-3,WS-2-10,XM-1-8-B,XS-2-1-A,XM-1-8-A,XM-1-1,XM-1-5-B,XS-3-10,XM-1-5-A,XS-1-5,WS-1-1,WS-2-1,XM-1-7,XM-1-4,XS-3-9	XS-2-2,XS-1-1-B,XS-2-1-B,XS-1-1-A,XS-2-8,XS-1-10,XS-1-9-A,XS-2-6,YLX-3-8,YLX-1-10,XS-3-8	XS-3-3,WS-3-1,XS-1-8,WS-3-3	XS-3-5,XS-3-1,XM-3-9	XM-2-7,XM-2-4,WS-3-8	WS-1-7,WS-1-8	WS-3-6-B,CY-1-5	WS-2-8,WS-2-6	CY-3-5	YLX-1-5	WS-3-2	WS-3-6-A	XS-2-9
0.09	13	XM-2-10,CY-2-1,XM-3-10,XM-3-5,XM-3-4,XM-2-6,XM-3-1,XM-1-2,CY-1-6,XM-3-3,CY-2-6,XM-3-2,CY-1-3,YLX-3-6,XM-3-7,CY-2-9,XM-3-8,WS-3-9,XM-3-6,YLX-2-3,XM-2-3,CY-3-3,XM-1-10,XS-1-4,YLX-3-3,XM-1-6,XS-1-9-B,YLX-1-2,XM-2-2,WS-3-7,YLX-2-7,WS-2-9,YLX-2-8,YLX-2-9,YLX-1-6,YLX-3-1,YLX-3-5,YLX-3-2,CY-3-6,YLX-3-4,YLX-3-10,YLX-2-1,YLX-2-2,YLX-1-4,YLX-2-4,YLX-2-6,XM-2-8,WS-1-9,YLX-3-9,YLX-2-10,WS-3-4,CY-3-4,CY-3-7,X…	CY-1-2,CY-1-7,WS-2-2,WS-1-5,XS-2-3,WS-2-10,XM-1-8-B,XS-2-1-A,XM-1-8-A,XM-1-1,XM-1-5-B,XS-3-10,XM-1-5-A,XS-1-5,WS-1-1,WS-2-1,XM-1-7,XM-1-4,XS-3-9	XS-2-2,XS-1-1-B,XS-2-1-B,XS-1-1-A,XS-2-8,XS-1-10,XS-1-9-A,XS-2-6,YLX-3-8,YLX-1-10,XS-3-8	XS-3-3,WS-3-1,XS-1-8,WS-3-3	XS-3-5,XS-3-1,XM-3-9	WS-1-7,WS-1-8,CY-3-5	XM-2-7,XM-2-4,WS-3-8	WS-2-8,WS-2-6	WS-3-6-B,CY-1-5	WS-3-6-A	XS-2-9	YLX-1-5	WS-3-2
0.1	11	XM-2-10,CY-2-1,XM-3-10,XM-3-5,XM-3-4,XM-2-6,XM-3-1,XM-1-2,CY-1-6,XM-3-3,CY-2-6,XM-3-2,CY-1-3,YLX-3-6,XM-3-7,CY-2-9,XM-3-8,WS-3-9,XM-3-6,YLX-2-3,XM-2-3,CY-3-3,XM-1-10,XS-1-4,YLX-3-3,XM-1-6,XS-1-9-B,YLX-1-2,XM-2-2,WS-3-7,YLX-2-7,WS-2-9,YLX-2-8,YLX-2-9,YLX-1-6,YLX-3-1,YLX-3-5,YLX-3-2,CY-3-6,YLX-3-4,YLX-3-10,YLX-2-1,YLX-2-2,YLX-1-4,YLX-2-4,YLX-2-6,XM-2-8,WS-1-9,YLX-3-9,YLX-2-10,WS-3-4,CY-3-4,CY-3-7,X…	CY-1-2,CY-1-7,WS-2-2,WS-1-5,XS-2-3,WS-2-10,XM-1-8-B,XS-2-1-A,XM-1-8-A,XM-1-1,XM-1-5-B,XS-3-10,XM-1-5-A,XS-1-5,WS-1-1,WS-2-1,XM-1-7,XM-1-4,XS-3-9,XS-2-9	XS-3-5,XS-3-1,XM-3-9,XS-2-2,XS-1-1-B,XS-2-1-B,XS-1-1-A,XS-2-8,XS-1-10,XS-1-9-A,XS-2-6,YLX-3-8,YLX-1-10,XS-3-8	XS-3-3,WS-3-1,XS-1-8,WS-3-3	WS-1-7,WS-1-8,CY-3-5	XM-2-7,XM-2-4,WS-3-8	WS-2-8,WS-2-6	WS-3-6-B,CY-1-5	WS-3-2	WS-3-6-A	YLX-1-5
0.11	8	XM-2-10,CY-2-1,XM-3-10,XM-3-5,XM-3-4,XM-2-6,XM-3-1,XM-1-2,CY-1-6,XM-3-3,CY-2-6,XM-3-2,CY-1-3,YLX-3-6,XM-3-7,CY-2-9,XM-3-8,WS-3-9,XM-3-6,YLX-2-3,XM-2-3,CY-3-3,XM-1-10,XS-1-4,YLX-3-3,XM-1-6,XS-1-9-B,YLX-1-2,XM-2-2,WS-3-7,YLX-2-7,WS-2-9,YLX-2-8,YLX-2-9,YLX-1-6,YLX-3-1,YLX-3-5,YLX-3-2,CY-3-6,YLX-3-4,YLX-3-10,YLX-2-1,YLX-2-2,YLX-1-4,YLX-2-4,YLX-2-6,XM-2-8,WS-1-9,YLX-3-9,YLX-2-10,WS-3-4,CY-3-4,CY-3-7,X…	CY-1-2,CY-1-7,WS-2-2,WS-1-5,XS-2-3,WS-2-10,XM-1-8-B,XS-2-1-A,XM-1-8-A,XM-1-1,XM-1-5-B,XS-3-10,XM-1-5-A,XS-1-5,WS-1-1,WS-2-1,XM-1-7,XM-1-4,XS-3-9,XS-2-9,WS-2-8,WS-2-6	XS-3-5,XS-3-1,XM-3-9,XS-2-2,XS-1-1-B,XS-2-1-B,XS-1-1-A,XS-2-8,XS-1-10,XS-1-9-A,XS-2-6,YLX-3-8,YLX-1-10,XS-3-8,WS-1-7,WS-1-8,CY-3-5	XS-3-3,WS-3-1,XS-1-8,WS-3-3,WS-3-6-B,CY-1-5	XM-2-7,XM-2-4,WS-3-8	WS-3-6-A	WS-3-2	YLX-1-5
0.12	7	XM-2-10,CY-2-1,XM-3-10,XM-3-5,XM-3-4,XM-2-6,XM-3-1,XM-1-2,CY-1-6,XM-3-3,CY-2-6,XM-3-2,CY-1-3,YLX-3-6,XM-3-7,CY-2-9,XM-3-8,WS-3-9,XM-3-6,YLX-2-3,XM-2-3,CY-3-3,XM-1-10,XS-1-4,YLX-3-3,XM-1-6,XS-1-9-B,YLX-1-2,XM-2-2,WS-3-7,YLX-2-7,WS-2-9,YLX-2-8,YLX-2-9,YLX-1-6,YLX-3-1,YLX-3-5,YLX-3-2,CY-3-6,YLX-3-4,YLX-3-10,YLX-2-1,YLX-2-2,YLX-1-4,YLX-2-4,YLX-2-6,XM-2-8,WS-1-9,YLX-3-9,YLX-2-10,WS-3-4,CY-3-4,CY-3-7,X…	CY-1-2,CY-1-7,WS-2-2,WS-1-5,XS-2-3,WS-2-10,XM-1-8-B,XS-2-1-A,XM-1-8-A,XM-1-1,XM-1-5-B,XS-3-10,XM-1-5-A,XS-1-5,WS-1-1,WS-2-1,XM-1-7,XM-1-4,XS-3-9,XS-2-9,WS-2-8,WS-2-6	XS-3-5,XS-3-1,XM-3-9,XS-2-2,XS-1-1-B,XS-2-1-B,XS-1-1-A,XS-2-8,XS-1-10,XS-1-9-A,XS-2-6,YLX-3-8,YLX-1-10,XS-3-8,WS-1-7,WS-1-8,CY-3-5	XS-3-3,WS-3-1,XS-1-8,WS-3-3,WS-3-6-B,CY-1-5	XM-2-7,XM-2-4,WS-3-8,WS-3-2	WS-3-6-A	YLX-1-5
0.13	6	XM-2-10,CY-2-1,XM-3-10,XM-3-5,XM-3-4,XM-2-6,XM-3-1,XM-1-2,CY-1-6,XM-3-3,CY-2-6,XM-3-2,CY-1-3,YLX-3-6,XM-3-7,CY-2-9,XM-3-8,WS-3-9,XM-3-6,YLX-2-3,XM-2-3,CY-3-3,XM-1-10,XS-1-4,YLX-3-3,XM-1-6,XS-1-9-B,YLX-1-2,XM-2-2,WS-3-7,YLX-2-7,WS-2-9,YLX-2-8,YLX-2-9,YLX-1-6,YLX-3-1,YLX-3-5,YLX-3-2,CY-3-6,YLX-3-4,YLX-3-10,YLX-2-1,YLX-2-2,YLX-1-4,YLX-2-4,YLX-2-6,XM-2-8,WS-1-9,YLX-3-9,YLX-2-10,WS-3-4,CY-3-4,CY-3-7,X…	CY-1-2,CY-1-7,WS-2-2,WS-1-5,XS-2-3,WS-2-10,XM-1-8-B,XS-2-1-A,XM-1-8-A,XM-1-1,XM-1-5-B,XS-3-10,XM-1-5-A,XS-1-5,WS-1-1,WS-2-1,XM-1-7,XM-1-4,XS-3-9,XS-2-9,WS-2-8,WS-2-6	XS-3-5,XS-3-1,XM-3-9,XS-2-2,XS-1-1-B,XS-2-1-B,XS-1-1-A,XS-2-8,XS-1-10,XS-1-9-A,XS-2-6,YLX-3-8,YLX-1-10,XS-3-8,WS-1-7,WS-1-8,CY-3-5	XS-3-3,WS-3-1,XS-1-8,WS-3-3,WS-3-6-B,CY-1-5	XM-2-7,XM-2-4,WS-3-8,WS-3-2	YLX-1-5
0.15	5	XM-2-10,CY-2-1,XM-3-10,XM-3-5,XM-3-4,XM-2-6,XM-3-1,XM-1-2,CY-1-6,XM-3-3,CY-2-6,XM-3-2,CY-1-3,YLX-3-6,XM-3-7,CY-2-9,XM-3-8,WS-3-9,XM-3-6,YLX-2-3,XM-2-3,CY-3-3,XM-1-10,XS-1-4,YLX-3-3,XM-1-6,XS-1-9-B,YLX-1-2,XM-2-2,WS-3-7,YLX-2-7,WS-2-9,YLX-2-8,YLX-2-9,YLX-1-6,YLX-3-1,YLX-3-5,YLX-3-2,CY-3-6,YLX-3-4,YLX-3-10,YLX-2-1,YLX-2-2,YLX-1-4,YLX-2-4,YLX-2-6,XM-2-8,WS-1-9,YLX-3-9,YLX-2-10,WS-3-4,CY-3-4,CY-3-7,X…	CY-1-2,CY-1-7,WS-2-2,WS-1-5,XS-2-3,WS-2-10,XM-1-8-B,XS-2-1-A,XM-1-8-A,XM-1-1,XM-1-5-B,XS-3-10,XM-1-5-A,XS-1-5,WS-1-1,WS-2-1,XM-1-7,XM-1-4,XS-3-9,XS-2-9,WS-2-8,WS-2-6	XS-3-5,XS-3-1,XM-3-9,XS-2-2,XS-1-1-B,XS-2-1-B,XS-1-1-A,XS-2-8,XS-1-10,XS-1-9-A,XS-2-6,YLX-3-8,YLX-1-10,XS-3-8,WS-1-7,WS-1-8,CY-3-5	XS-3-3,WS-3-1,XS-1-8,WS-3-3,WS-3-6-B,CY-1-5	XM-2-7,XM-2-4,WS-3-8,WS-3-2
0.18	3	XS-3-5,XS-3-1,XM-3-9,XS-2-2,XS-1-1-B,XS-2-1-B,XS-1-1-A,XS-2-8,XS-1-10,XS-1-9-A,XS-2-6,YLX-3-8,YLX-1-10,XS-3-8,WS-1-7,WS-1-8,CY-3-5,XM-2-10,CY-2-1,XM-3-10,XM-3-5,XM-3-4,XM-2-6,XM-3-1,XM-1-2,CY-1-6,XM-3-3,CY-2-6,XM-3-2,CY-1-3,YLX-3-6,XM-3-7,CY-2-9,XM-3-8,WS-3-9,XM-3-6,YLX-2-3,XM-2-3,CY-3-3,XM-1-10,XS-1-4,YLX-3-3,XM-1-6,XS-1-9-B,YLX-1-2,XM-2-2,WS-3-7,YLX-2-7,WS-2-9,YLX-2-8,YLX-2-9,YLX-1-6,YLX-3-1,YL…	XS-3-3,WS-3-1,XS-1-8,WS-3-3,WS-3-6-B,CY-1-5	XM-2-7,XM-2-4,WS-3-8,WS-3-2
0.21	2	XS-3-5,XS-3-1,XM-3-9,XS-2-2,XS-1-1-B,XS-2-1-B,XS-1-1-A,XS-2-8,XS-1-10,XS-1-9-A,XS-2-6,YLX-3-8,YLX-1-10,XS-3-8,WS-1-7,WS-1-8,CY-3-5,XM-2-10,CY-2-1,XM-3-10,XM-3-5,XM-3-4,XM-2-6,XM-3-1,XM-1-2,CY-1-6,XM-3-3,CY-2-6,XM-3-2,CY-1-3,YLX-3-6,XM-3-7,CY-2-9,XM-3-8,WS-3-9,XM-3-6,YLX-2-3,XM-2-3,CY-3-3,XM-1-10,XS-1-4,YLX-3-3,XM-1-6,XS-1-9-B,YLX-1-2,XM-2-2,WS-3-7,YLX-2-7,WS-2-9,YLX-2-8,YLX-2-9,YLX-1-6,YLX-3-1,YL…	XS-3-3,WS-3-1,XS-1-8,WS-3-3,WS-3-6-B,CY-1-5,XM-2-7,XM-2-4,WS-3-8,WS-3-2
0.22	1	XS-3-5,XS-3-1,XM-3-9,XS-2-2,XS-1-1-B,XS-2-1-B,XS-1-1-A,XS-2-8,XS-1-10,XS-1-9-A,XS-2-6,YLX-3-8,YLX-1-10,XS-3-8,WS-1-7,WS-1-8,CY-3-5,XM-2-10,CY-2-1,XM-3-10,XM-3-5,XM-3-4,XM-2-6,XM-3-1,XM-1-2,CY-1-6,XM-3-3,CY-2-6,XM-3-2,CY-1-3,YLX-3-6,XM-3-7,CY-2-9,XM-3-8,WS-3-9,XM-3-6,YLX-2-3,XM-2-3,CY-3-3,XM-1-10,XS-1-4,YLX-3-3,XM-1-6,XS-1-9-B,YLX-1-2,XM-2-2,WS-3-7,YLX-2-7,WS-2-9,YLX-2-8,YLX-2-9,YLX-1-6,YLX-3-1,YL…
[truncated: 19 more columns]

## Sheet: represent sequence information
numOtus	represent sequences	similar strains	strain number	similarity	number	Phylum	Class	Order	Family	Genus
Otu001	WS-3-9	Pseudomonas koreensis	NR_025228.1	1	WS29	Proteobacteria	Gammaproteobacteria	Pseudomonadales	Pseudomonadaceae	Pseudomonas
Otu002	XS-1-1-A	Duganella zoogloeoides	NR_025833.1	0.98	XS01	Proteobacteria	Betaproteobacteria	Burkholderiales	Oxalobacteraceae	Duganella
Otu003	XM-1-5-B	Rhizobium multihospitium	NR_044053.1	0.99	XM06	Proteobacteria	Alphaproteobacteria	Rhizobiales	Rhizobiaceae	Rhizobium
Otu004	XS-1-8	Arthrobacter oxydans	NR_026236.1	0.99	XS08	Actinobacteria	Actinobacteria	Micrococcales	Micrococcaceae	Pseudarthrobacter
Otu005	WS-2-1	Rhizobium galegae	NR_113713.1	0.99	WS10	Proteobacteria	Alphaproteobacteria	Rhizobiales	Rhizobiaceae	Neorhizobium
Otu006	CY-1-2	Agrobacterium tumefaciens	NR_115516.1	0.99	CY02	Proteobacteria	Alphaproteobacteria	Rhizobiales	Rhizobiaceae	Agrobacterium
Otu007	XM-2-4	Bacillus aryabhattai	NR_115953.1	0.99	XM16	Firmicutes	Bacilli	Bacillales	Bacillaceae	Bacillus
Otu008	WS-1-8	Mitsuaria chitosanitabida	NR_114070.1	0.99	WS07	Proteobacteria	Betaproteobacteria	Burkholderiales	Burkholderiales	Mitsuaria
Otu009	XS-3-1	Burkholderia sediminicola	NR_044383.1	0.99	XS23	Proteobacteria	Betaproteobacteria	Burkholderiales	Burkholderiaceae	Paraburkholderia
Otu010	WS-2-6	Bosea lathyri	NR_108515.1	0.99	WS15	Proteobacteria	Alphaproteobacteria	Rhizobiales	Bradyrhizobiaceae	Bosea
Otu011	XM-1-4	Rhizobium alamii	NR_042687.1	0.99	XM04	Proteobacteria	Alphaproteobacteria	Rhizobiales	Rhizobiaceae	Rhizobium
Otu012	XM-3-9	Burkholderia contaminans	NR_104978.1	0.99	XM31	Proteobacteria	Betaproteobacteria	Burkholderiales	Burkholderiaceae	Burkholderia
Otu013	WS-3-6-A	Lysobacter gummosus	NR_041005.1	0.99	WS25	Proteobacteria	Gammaproteobacteria	Xanthomonadales	Xanthomonadaceae	Lysobacter
Otu014	WS-3-8	Bacillus simplex	NR_114919.1	0.99	WS28	Firmicutes	Bacilli	Bacillales	Bacillaceae	Bacillus
Otu015	XS-3-9	Phyllobacterium myrsinacearum	NR_043189.1	0.99	XS29	Proteobacteria	Alphaproteobacteria	Rhizobiales	Phyllobacteriaceae	Phyllobacterium
Otu016	YLX-1-5	Pantoea agglomerans	NR_041978.1	0.99	YL04	Proteobacteria	Gammaproteobacteria	Enterobacterales	Erwiniaceae	Pantoea
Otu017	WS-1-5	Rhizobium giardinii	NR_026059.1	0.99	WS05	Proteobacteria	Alphaproteobacteria	Rhizobiales	Rhizobiaceae	Rhizobium
Otu018	XS-2-9	Paracoccus marcusii	NR_044922.1	0.99	XS21	Proteobacteria	Alphaproteobacteria	Rhodobacterales	Rhodobacteraceae	Paracoccus
Otu019	WS-3-2	Paenibacillus borealis	NR_025299.1	0.99	WS21	Firmicutes	Bacilli	Bacillales	Paenibacillaceae	Paenibacillus
Otu020	CY-1-5	Nocardioides lianchengensis	NR_118013.1	0.99	CY05	Actinobacteria	Actinobacteria	Propionibacteriales	Nocardioidaceae	Nocardioides
Otu021	XS-3-3	Brachybacterium paraconglomeratum	NR_113401.1	0.99	XS24	Actinobacteria	Actinobacteria	Micrococcales	Dermabacteraceae	Brachybacterium
Otu022	WS-3-6-B	Nocardioides albertanoniae	NR_132396.1	0.99	WS26	Actinobacteria	Actinobacteria	Propionibacteriales	Nocardioidaceae	Nocardioides
Otu023	CY-3-5	Variovorax gossypii	KR349468.1	0.99	CY25	Proteobacteria	Betaproteobacteria	Burkholderiales	Comamonadaceae	Variovorax
OUT-GROUP		Flavobacterium johnsoniae	NR_074455.1			Bacteroidetes	Flavobacteriia	Flavobacteriales	Flavobacteriaceae	Flavobacterium

## Sheet: composition & diversity
genus	XM	CY	XS	WS	YL		sample	Shannon
Agrobacterium		0.0833333		0.037037			XM-1	0.610864
Bacillus	0.0689655			0.037037			XM-2	0.529706
Bosea				0.0740741			XM-3	0.325083
Brachybacterium			0.0434783				CY-1	0.9557
Burkholderia	0.0344828						CY-2	0
Duganella			0.391304		0.0714286		CY-3	0.410116
Lysobacter				0.037037			XS-1	1.21489
Mitsuaria				0.0740741			XS-2	1.21301
Neorhizobium			0.0434783	0.0740741			XS-3	1.56071
Nocardioides		0.0416667		0.037037			WS-1	1.21301
Paenibacillus				0.037037			WS-2	1.42706
Pantoea					0.0357143		WS-3	1.60944
Paraburkholderia			0.0869565				YLX-1	0.735622
Paracoccus			0.0434783				YLX-2	0
Phyllobacterium			0.0434783				YLX-3	0.325083
Pseudarthrobacter			0.0434783	0.0740741
Pseudomonas	0.655172	0.833333	0.173913	0.444444	0.892857
Rhizobium	0.241379		0.130435	0.0740741
Variovorax		0.0416667
total	1	1	1	1	1

## Sheet: growth-promoting products
sample	number	IAA ug/ml		siderophores units	phosphorus solubility index
		72h	144h
CY-1-2	CY02	2.19995	4.40546	0.812762	2.0875
CY-1-3	CY03	1.63321	2.87199	0.36766	1.80833
CY-1-4	CY04	2.35874	10.7277	0.361419	1.66667
CY-1-5	CY05	1.87346	2.90448	0.282582	1.65417
CY-1-6	CY06	5.85087	9.45419	0.316088	1.425
CY-1-7	CY07	4.01104	8.53151	0.72407	1
CY-1-9	CY09	8.41076	10.1624	0.333498	1.65
CY-2-1	CY11	1.31751	2.33361	0.220169	1.625
CY-2-10	CY20	0.99307	3.99702	0.524678	2.25
CY-2-2	CY12	1.82469	2.22314	0.580192	2.9625
CY-2-3	CY13	2.11833	4.40638	0.546686	2.75
CY-2-4	CY14	4.51052	5.29657	0.342367	1.825
CY-2-5	CY15	2.12722	3.99702	0.550628	2.15
CY-2-6	CY16	1.18403	5.42652	0.382771	1.45
CY-2-7	CY17	1.62962	4.61431	0.293094	1.5
CY-2-8	CY18	2.23948	2.97688	0.573622	2.2
CY-2-9	CY19	2.17377	3.2173	0.462922	1.54583
CY-3-3	CY23	1.56665	2.57402	0.267351	1.85
CY-3-4	CY24	2.65015	5.82288	0.356987	1.66667
CY-3-5	CY25	4.60977	8.70788	0.310613	1.5875
CY-3-6	CY26	1.41059	2.97038	0.339558	1.65
CY-3-7	CY27	2.15597	7.55128	0.358232	1.6375
CY-3-8	CY28	2.47425	17.4603	0.319328	1.8375
CY-3-9	CY29	2.62551	22.5155	0.29225	1.45
WS-1-1	WS01	1.37402	2.09526	0.408288	1
WS-1-10	WS09	3.41638	4.99052	0.521948	1
WS-1-2	WS02	5.38911	8.52698	0.579345	1
WS-1-4	WS04	13.2626	27.6068	0.471349	1
WS-1-5	WS05	3.67747	5.82018	0.0046257	1
WS-1-7	WS06	1.5916	3.12806	0.26593	1
WS-1-8	WS07	0.848927	3.07666	0.378835	1
WS-1-9	WS08	20.8228	23.6787	0.573681	1
WS-2-1	WS10	3.14005	11.6018	0.107335	1
WS-2-10	WS19	2.40318	3.61601	0.56122	1.45
WS-2-2	WS11	7.98194	10.7526	0.319173	1
WS-2-3	WS12	2.13048	9.48727	0.479279	1
WS-2-4	WS13	4.28017	7.62726	0.516284	1
WS-2-5	WS14	2.42639	4.50196	0.558954	1.475
WS-2-6	WS15	0.505875	1.20044	0.0204852	1
WS-2-8	WS17	0.555193	1.37665	0.0408761	1
WS-2-9	WS18	1.61989	2.92095	0.471349	1
WS-3-1	WS20	2.44379	3.23697	0.592679	1.4
WS-3-2	WS21	1.3907	2.94328	0.556464	1.4
WS-3-3	WS22	1.53866	1.80035	0.100077	1
WS-3-4	WS23	2.95438	5.31969	0.44665	1
WS-3-5	WS24	3.8102	9.96237	0.495327	1
WS-3-6-A	WS25	0.502974	0.517927	0.174454	1
WS-3-6-B	WS26	3.04721	7.71323	0.51947	1
WS-3-7	WS27	4.42813	5.79203	0.496105	1
WS-3-8	WS28	2.82383	2.91147	0	1
WS-3-9	WS29	5.48122	6.0539	0.359423	1
XM-1-1	XM01	3.80993	4.26554	0.0792171	1
XM-1-10	XM12	8.54737	6.26554	0.32763	1.325
XM-1-2	XM02	5.72774	4.57062	0.353023	1.3875
XM-1-4	XM04	13.1592	13.5311	0.360015	1.45
XM-1-5-A	XM05	5.46518	3.57627	0.0784811	1
XM-1-5-B	XM06	24.7232	40.0508	0.120435	1
XM-1-6	XM07	40.9218	40.096	0.234153	1
XM-1-7	XM08	5.22546	7.46328	0.202503	1
XM-1-8-A	XM09	2.4629	6.51412	0	1
XM-1-8-B	XM10	12.9538	12.0621	0.298556	1
XM-2-1	XM13	27.52	38.7444	0.290073	1.475
XM-2-10	XM22	5.29395	4.21328	0.405436	1.24583
XM-2-2	XM14	17.1204	11.9986	0.451513	1.51667
XM-2-3	XM15	13.1478	13.8065	0.385981	1
XM-2-4	XM16	12.5656	13.5918	0.267888	1
XM-2-5	XM17	24.9401	32.0777	0.314989	1.3375
XM-2-6	XM18	5.30537	5.04944	0.388712	1.2625
XM-2-7	XM19	8.19349	4.41667	0.227954	1
XM-2-8	XM20	4.86016	3.97599	0.339222	1.85
XM-3-1	XM23	23.1022	41.6031	0.396562	1.60417
XM-3-10	XM32	15.0771	12.9364	0.366527	1.47917
XM-3-2	XM24	6.24144	29.1624	0.116345	1.7
XM-3-3	XM25	17.6912	24.9364	0.299288	1.5
XM-3-4	XM26	14.472	9.49011	0.350144	1.38333
XM-3-5	XM27	39.5976	34.3602	0.283247	1
XM-3-6	XM28	13.6273	11.0833	0.298947	1
XM-3-7	XM29	6.88071	6.31497	0.413627	1
XM-3-8	XM30	7.00628	6.73305	0.408166	1
XM-3-9	XM31	5.86473	5.7387	0	2
XS-1-10	XS11	3.17226	0.93509	0.0870683	1
XS-1-1-A	XS01	1.41557	7.53606	0	1
XS-1-1-B	XS02	3.51691	2.37468	0	1
XS-1-4	XS05	2.40837	6.65917	0.287077	1
XS-1-5	XS06	1.37185	3.36011	0	1
XS-1-6	XS07	4.19078	5.33955	0.280456	1
XS-1-8	XS08	2.12288	2.62889	0	1
XS-1-9-A	XS09	1.95055	1.70915	0	1
XS-1-9-B	XS10	2.51125	9.30413	0.309029	1
XS-2-10	XS22	4.94406	11.1715	0.190582	1
XS-2-1-A	XS12	2.67297	3.08233	0.00356363	1
XS-2-1-B	XS13	2.76813	3.81641	0.215451	1
XS-2-2	XS14	3.0099	4.64474	0.0241224	1
XS-2-3	XS15	2.84015	3.27942	0.0410336	1
XS-2-6	XS18	4.74601	7.47251	0.254248	1
XS-2-8	XS20	3.19509	3.55648	0.0695506	1
XS-2-9	XS21	4.71258	15.4417	0.104036	1
XS-3-1	XS23	2.53151	6.72986	0	1
XS-3-10	XS30	2.69097	10.3345	0.247948	1.5
XS-3-3	XS24	0.818544	5.88153	0	1
XS-3-5	XS25	0.916281	1.44566	0.0483287	1
XS-3-8	XS28	1.41268	4.15917	0.270496	1
XS-3-9	XS29	1.17348	4.40767	0.199535	1
YLX-1-10	YL09	1.79558	2.45092	0	1
YLX-1-2	YL01	2.96989	4.80403	0.353598	1.425
YLX-1-3	YL02	3.06969	3.2828	0.0508357	1
YLX-1-4	YL03	2.69711	2.83486	0.27427	1.425
YLX-1-5	YL04	15.6013	28.6289	0.521607	1
YLX-1-6	YL05	3.78493	5.37704	0.285702	1.38333
YLX-1-8	YL07	10.3185	20.5748	0.23859	1.375
YLX-1-9	YL08	7.73703	18.8005	0.253832	1
YLX-2-1	YL10	2.3503	3.5693	0.139863	1.21667
YLX-2-10	YL19	3.43147	9.79676	0.222655	1.225
YLX-2-2	YL11	2.91583	4.36627	0.33316	1.46667
YLX-2-3	YL12	1.85795	2.99338	0.299212	1.49167
YLX-2-4	YL13	2.57984	4.8462	0.34667	1.43333
YLX-2-5	YL14	3.1853	9.06668	0.288127	1.325
YLX-2-6	YL15	2.29375	2.82759	0.22993	1.49167
YLX-2-7	YL16	2.19727	3.31624	0.235472	1.475
YLX-2-8	YL17	3.12542	6.94626	0.19321	1.4125
YLX-2-9	YL18	2.56321	3.56348	0.287434	1.50833
YLX-3-1	YL20	2.46341	8.17954	0.327771	1.40833
YLX-3-10	YL29	2.19062	6.64085	0.287723	1.40833
YLX-3-2	YL21	2.18397	6.12602	0.307747	1.65
YLX-3-3	YL22	2.6497	5.7857	0.390067	1.5
YLX-3-4	YL23	2.51663	4.55534	0.336352	1.4
YLX-3-5	YL24	2.95243	9.21211	0.258799	1.55
YLX-3-6	YL25	2.70293	4.45063	0.31601	1.4
YLX-3-7	YL26	2.44012	6.30636	0.389749	1.4
YLX-3-8	YL27	1.3157	2.90031	0.292808	1.55
YLX-3-9	YL28	2.49002	3.78454	0.286134	1.45

## Sheet: Plant growth index
OUT	genus	represent isolates	repetition	shoot length	root length	shoot wet-biomass	shoot dry-biomass	root wet-biomass	root dry-biomass
Otu002	Duganella	XS-1-1-A	1	4.2	5.5	0.094	0.0078	0.054	0.006
			2	4.6	6	0.175	0.0122	0.058	0.0056
			3	4.3	5.3	0.063	0.0043	0.012	0.0012
Otu003	Rhizobium	XM-1-5-B	1	6.5	5	0.161	0.0109	0.016	0.0018
			2	6	5.1	0.241	0.0164	0.024	0.0023
			3	3.2	2	0.061	0.0042	0.004	0.0005
Otu011	Rhizobium	XM-1-4	1	7	5.5	0.177	0.0121	0.011	0.0013
			2	7.5	5	0.512	0.0357	0.038	0.0038
			3	7.8	4.3	0.171	0.0114	0.011	0.0012
Otu001	Pseudomonas	WS-3-9	1	13	5.2	1.025	0.0714	0.053	0.0053
			2	9.5	4.3	0.35	0.0239	0.018	0.0017
			3	4	2.3	0.039	0.0026	0.003	0.0003
Otu017	Rhizobium	WS-1-5	1	15	6.5	0.86	0.0599	0.08	0.0089
			2	15.6	5.9	1.208	0.0803	0.04	0.0039
			3	13.5	6	0.617	0.042	0.038	0.0037
Otu001	Pseudomonas	WS-2-5	1	16.5	5.7	2.39	0.1584	0.109	0.0133
			2	12.5	7	0.8	0.0558	0.04	0.004
			3	7.8	4.2	0.338	0.0229	0.034	0.0034
CK			1	6	2.3	0.017	0.0012	0.001	0.0001
			2	4.6	3	0.036	0.0024	0.001	0.0001
			3	3.8	2.7	0.02	0.0014	0.001	0.0001
